# Supplementary material
Source: PubMed Central journal article supplement (PMC11072019)

A

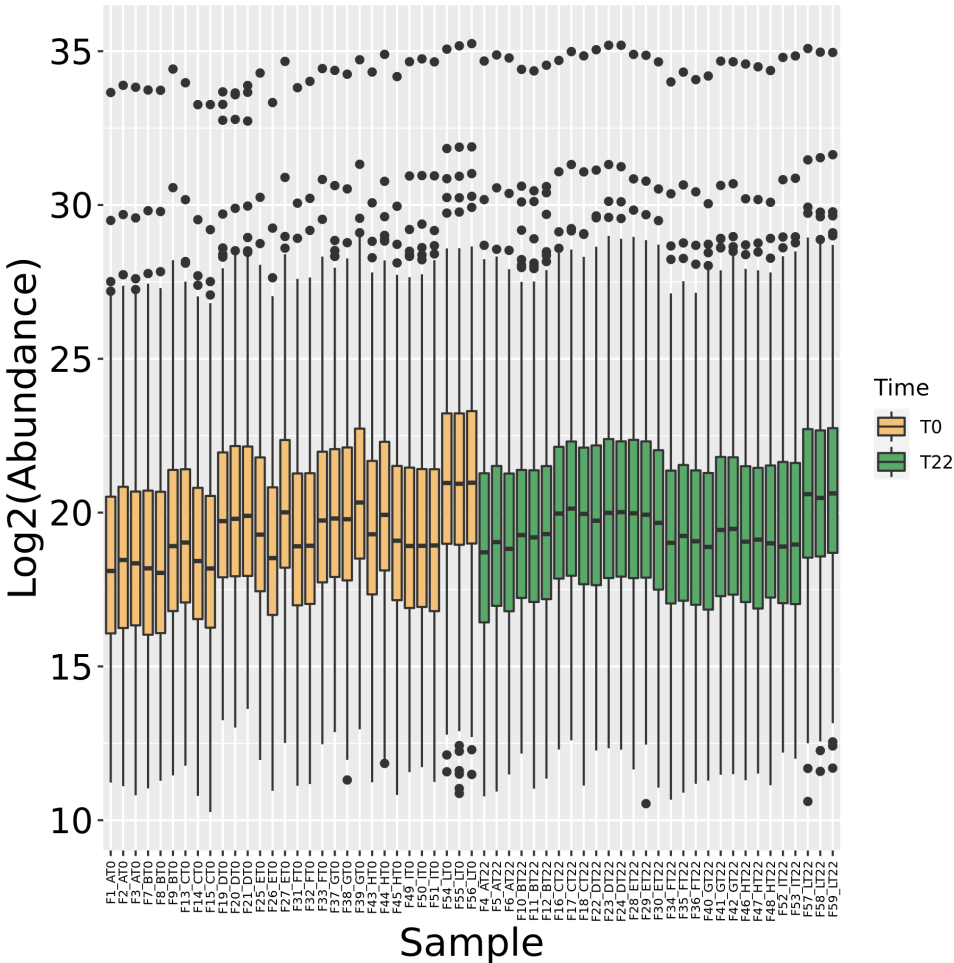

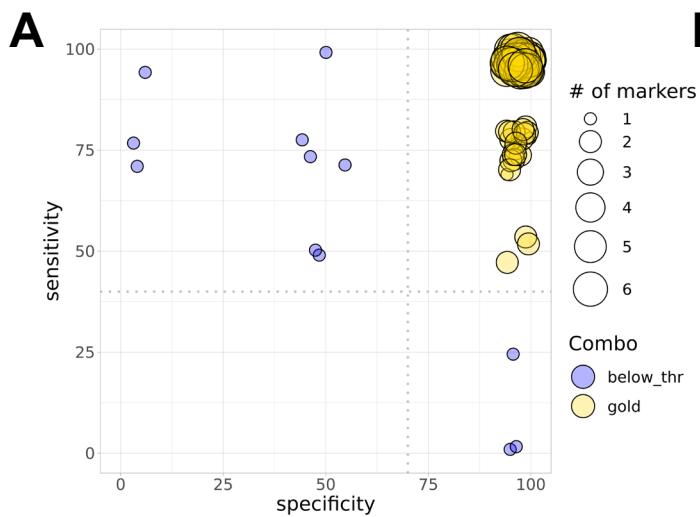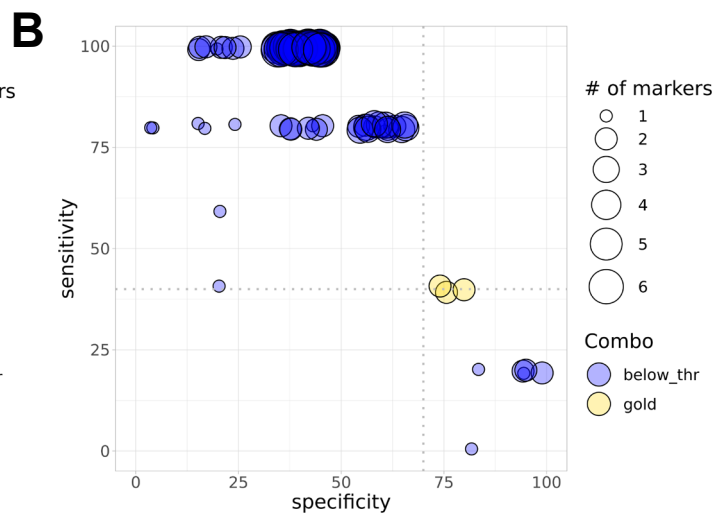

A

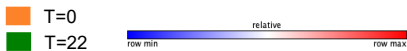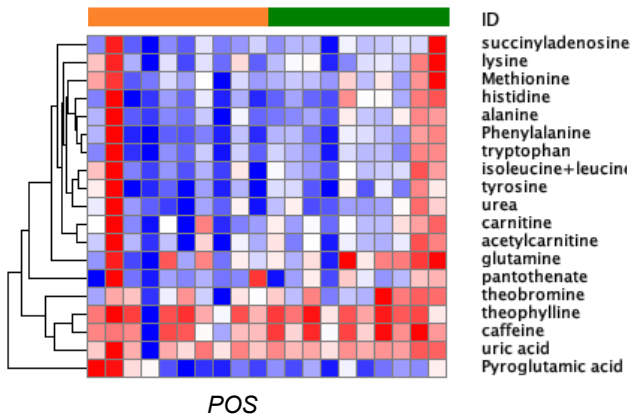

B

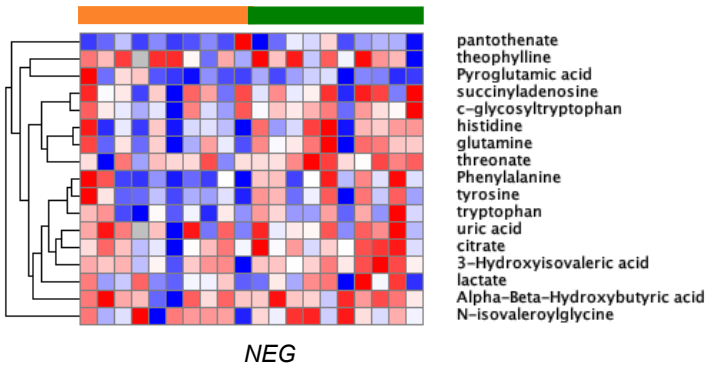

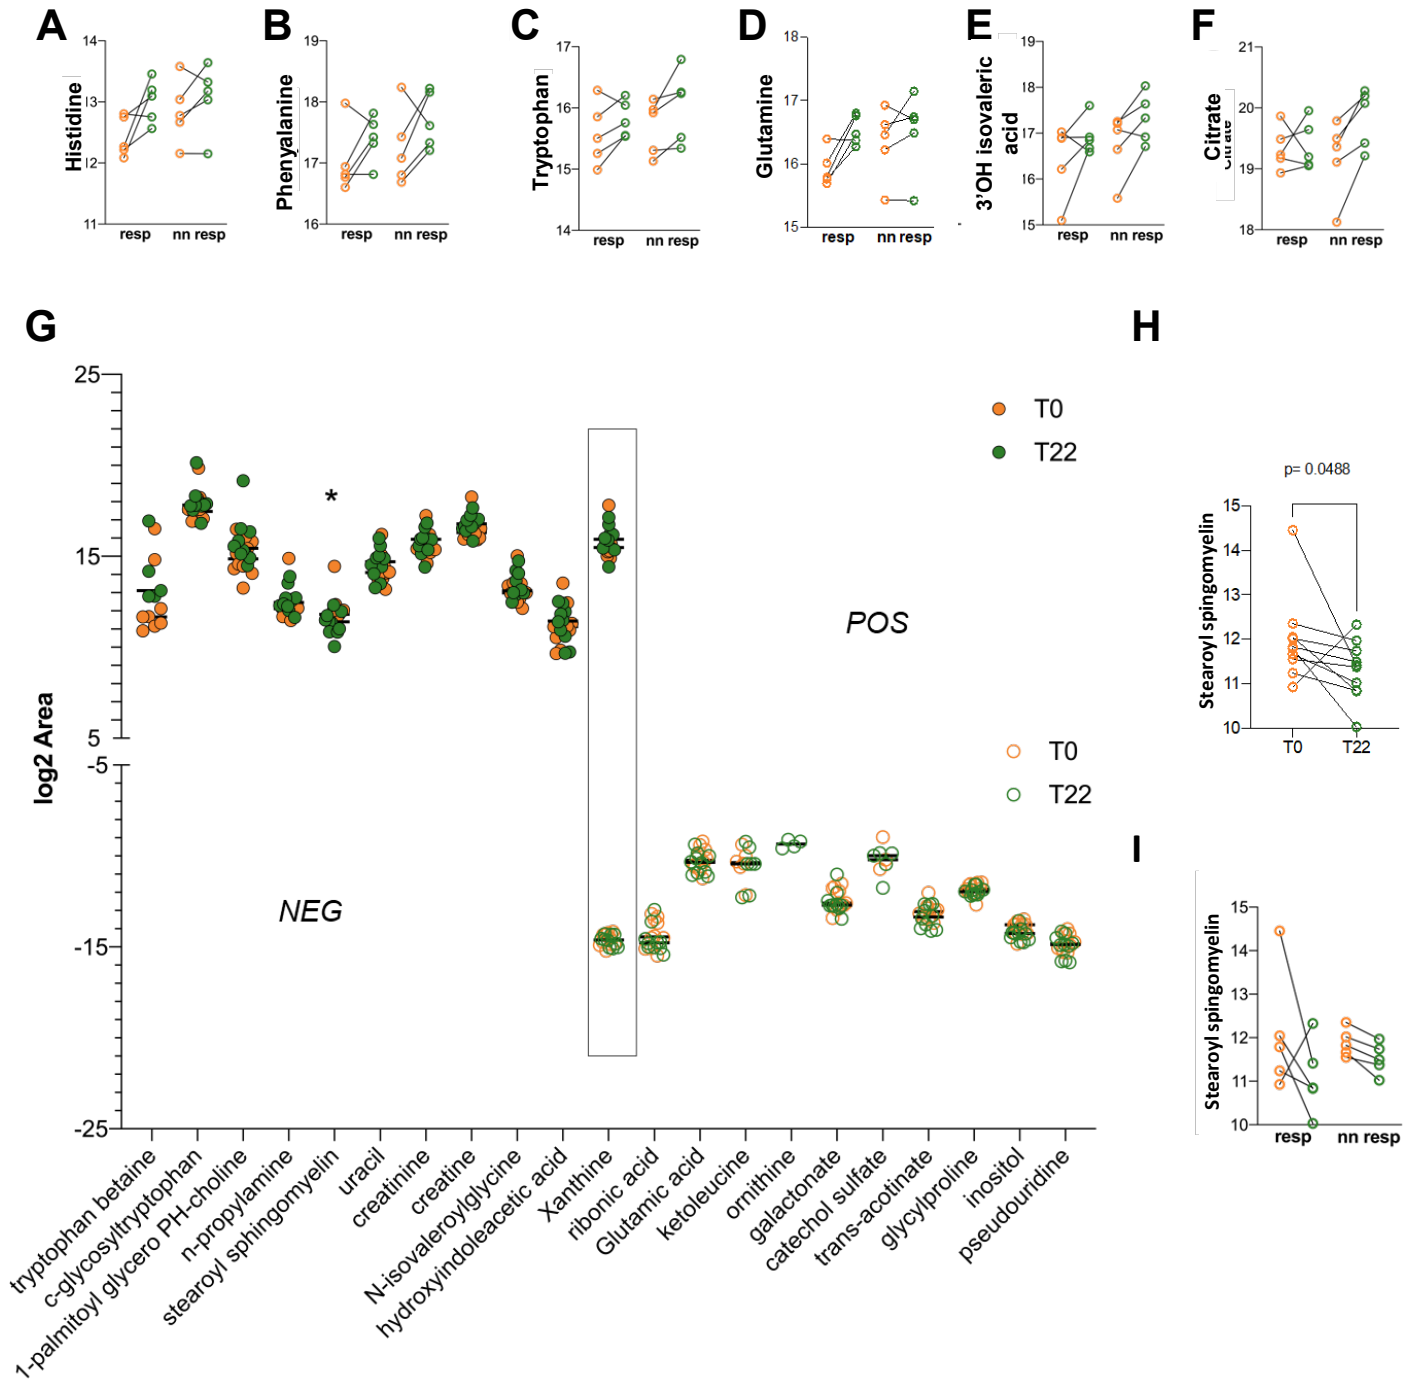

Supplement: 18_2023_4885_MOESM1_ESM.pdf [file 18_2023_4885_MOESM1_ESM.pdf]
